# Supplementary material for: The PTEN phosphatase functions cooperatively with the Fanconi anemia proteins in DNA crosslink repair
Source: PubMed Central journal article supplement (PMC5098254; doi:10.1038/srep36439), 2016-11-07

# **The PTEN phosphatase functions cooperatively with the Fanconi anemia proteins in DNA crosslink repair**

**Elizabeth A. Vuono,<sup>1</sup> Ananda Mukherjee,<sup>2</sup> David A. Vierra,<sup>1</sup> Morganne M. Adroved,<sup>1</sup> Charlotte Hodson,<sup>3</sup> Andrew J. Deans,<sup>3,4</sup> and Niall G. Howlett<sup>1,\*</sup>**

<sup>1</sup>Department of Cell and Molecular Biology, University of Rhode Island, Kingston, Rhode Island, U.S.A

<sup>2</sup>Department of Obstetrics, Gynecology, and Reproductive Biology, Michigan State University, Grand Rapids, Michigan, U.S.A.

<sup>3</sup>Genome Stability Unit, St. Vincent's Institute, Fitzroy, VIC 3065, Australia

<sup>4</sup>Department of Medicine, The University of Melbourne, Parkville, VIC 3010, Australia

\*To whom correspondence should be addressed: Niall G. Howlett Ph.D., 379 Center for Biotechnology and Life Sciences, 120 Flagg Road, Kingston, RI, USA, Tel.: +1 401 874 4306; Fax: +1 401 874 2065; *Email address:* [nhowlett@uri.edu](mailto:nhowlett@uri.edu)

**Supplementary information**

## Materials and methods

### Antibody generation

FANCM monoclonal antibodies were generated by intra-peritoneal injection of recombinant purified FANCM peptide (His-tagged amino acids 1507-1647 purified from *E. coli* using Nickel-NTA resin under guanidine-HCl denaturing conditions). Standard hybridoma generation protocols were employed using Sp2/0-Ag14 murine myeloma cells, followed by single cell cloning of the highest titer lines. Independently derived monoclonal antibodies CE56.1, CP3.2, CV5.1, and CV11.1 were purified from hybridoma supernatants using protein A sepharose, and shown to detect a single band of 230 kDa by Western blotting, that is absent in FANCM siRNA treated cells (see **Figure S10**).

### Plasmids and site-directed mutagenesis

The plasmids pSG5L-HA-PTEN wild type, -PTEN-C124S, -PTEN-G129E and pHR-SIN-PTEN-Y138L (Addgene) were used to amplify *PTEN* cDNA using the forward primer 5'-CACCATGACAGCCATCATCAAA-3' and the reverse primer 5'-TCAGACTTTTGTAAATTTGTGTATGCTG-3'. The cDNAs were then recombined into pLenti6.2/V5-DEST (Invitrogen) using Invitrogen Gateway Cloning. The *PTEN-K254R* cDNA was generated by site-directed mutagenesis of the wild type *PTEN* cDNA using the Quikchange Site-directed Mutagenesis Kit (Stratagene). The forward and reverse oligonucleotide sequences used are as follows:

FP 5'-CGTTACCTGTGTGTGGTGATATCCGAGTAGAGTTCTTCCACAAAC-3'

RP 5'-GTTTGTGGAAGAACTCTACTCGGATATCACCACACACAGGTAACG-3'.

### **Cellular fractionation**

Soluble proteins were removed by extraction in cytoskeletal buffer (CSK) (10 mM PIPES pH 6.8, 300 mM sucrose, 100 mM NaCl, 3 mM MgCl<sub>2</sub>, 1 mM EGTA, and 0.5% v/v Triton-X-100) for 10 minutes at 4°C. Pellets were washed once with CSK buffer, lysed in SDS sample buffer (2% w/v SDS, 50 mM Tris-HCl pH 7.4, 10 mM EDTA), boiled for 15 min, followed by sonication for 10 s at 10% amplitude using a Fisher Scientific Model 500 Ultrasonic Dismembrator.

### **Chromosome breakage and cytotoxicity assays**

For chromosome breakage assays, cells were incubated in the absence or presence of MMC for 18-24 h. Prior to harvesting, cells were treated with 0.1 µg/ml Colcemid (Gibco/Invitrogen) for 2 h. Cell pellets were incubated in 0.075 M KCl at 37°C for 18 min, followed by fixation in Carnoy's fixative (3:1 methanol:glacial acetic acid) with multiple changes. Cells were dropped onto chilled slides and air-dried prior to staining with 2.5% w/v Giemsa solution (Sigma).

Metaphases were analyzed using a Zeiss AxioImager.A1 upright epifluorescent microscope with AxioVision LE 4.6 image acquisition software. For the cell proliferation assay, cells were plated at 10,000 cells/well, treated in the absence or presence of various concentrations of MMC for 48 h and the CellTiter 96® AQueous One Solution Reagent (Promega) was added directly to cultured cells, incubated for 2 h and the absorbance at 490 nm was measured with a 96-well Bio-Rad 680 microplate reader. For the MMC survival assay, cells were plated at a density of 10,000 cells/well in 6-well dishes and treated with MMC the following day for 7 days. Cells were then fixed with 10% v/v methanol and 10% v/v acetic acid, stained with 1% w/v crystal violet in methanol, extracted with 0.02% SDS in methanol, and the absorbance at 595 nm was measured

with a 96-well Bio-Rad 680 microplate reader.

### ***In vitro* phosphatase assays**

Recombinant FANCM and PTEN were purified as previously described<sup>1,2</sup>. 20  $\mu$ L reactions containing FANCM (0.2  $\mu$ g) and/or PLK1 (Invitrogen, 0.2  $\mu$ g) were incubated with 50  $\mu$ M <sup>32</sup>P-ATP in reaction buffer (50 mM Tris, pH7.5, 10 mM MgCl<sub>2</sub>, 2 mM EDTA, 1 mM TCEP) for 30 min. PTEN (0, 0.1, 0.3, 1  $\mu$ g) was added together with PLK inhibitor BI-2356 (to stop additional phosphorylation from occurring and ensure only dephosphorylation was being measured) followed by another 30 min at 30°C. Then sample-loading buffer (Invitrogen) was added to stop the reaction. After SDS-PAGE, the gel was stained with Instant BLUE (Expedeon), dried and exposed to radiographic film.

### **siRNA experiments**

Cells were plated in six-well dishes at a density of 200,000 cells/well and transfected the following day with PTEN-specific (siPTEN), FANCD2-specific (siFANCD2), or control, non-targeting siRNA (siCtrl) using Lipofectamine 2000 (Invitrogen). Seventy-two hours following transfection, cells were incubated in the absence or presence of MMC and harvested for cytogenetic analysis as described above. The following sense and anti-sense sequences were used: siFANCD2 (Dharmacon) 5'-CAGCCUACCUGAGA UCCUA-3' and 5'-UAGGAUCUCAGGUAGGCUG-3' and for non-targeting siCtrl (Dharmacon) 5'-UAACGACGCGACGACGUAA-3' and 5'-UUACGUCGUCGCGUCGUUA-3'. PTEN siRNAs (siGENOME SMARTpool siRNA reagent D-001810-01-05) were obtained from Thermo Fisher Scientific.

## **Mitomycin C**

The concentrations of mitomycin C (MMC) used in this study vary widely depending on the assay being performed. Lower concentrations of MMC (10-40 nM) are used for metaphase chromosome analyses, as higher concentrations will arrest cells in M-phase, resulting in a low yield of mitotic cells, precluding analysis. In contrast, when using immunoblotting or immunofluorescence microscopy to examine the activation of signal transduction pathways, higher concentrations of MMC (>200 nM) are typically necessary to detect protein posttranslational modifications. For cell survival assays, a wide range of concentrations (10 nM - 1  $\mu$ M) is typically employed.

## **Figure legends**

### **Figure S1. PTEN<sup>-/-</sup> cells are hypersensitive to mitomycin C**

(A) HCT116 PTEN<sup>+/+</sup> and two independent clones of PTEN<sup>-/-</sup> cells were incubated in the absence or presence of the indicated concentrations of MMC for 7-10 days, and cell survival was determined using a crystal violet assay. (B) MCF10A PTEN<sup>+/+</sup> and PTEN<sup>-/-</sup> cells were incubated in the absence or presence of the indicated concentrations of MMC for 7-10 days and cell survival determined. (C and D) MCF10A PTEN<sup>+/+</sup> and PTEN<sup>-/-</sup> cells were incubated in the absence or presence of the indicated concentrations of MMC for 24 h and metaphase spreads were analyzed for chromosome aberrations. (C) Numbers of centromere aberrations observed in PTEN<sup>+/+</sup> and PTEN<sup>-/-</sup> cells and (D) representative images of centromere aberrations observed in PTEN<sup>-/-</sup> cells. \*\*\*,  $P < 0.001$ .

**Figure S2. PTEN is required for efficient mitomycin C-inducible FANCD2 and FANCI nuclear foci formation, but not for the localization of FANCD2 and FANCI to chromatin**

(A) Chromatin fractionation analysis of lysates from HCT116 PTEN<sup>+/+</sup> and PTEN<sup>-/-</sup> cells reveals efficient localization of FANCD2, FANCI, and RAD51 to chromatin following mitomycin C (MMC) treatment. Cells were incubated in the absence (NT) or presence of 200 nM MMC for 24 h. W, unfractionated whole-cell lysate; S, soluble cytoplasmic and nuclear fraction; C, chromatin-enriched fraction. (B and C) MCF10A PTEN<sup>+/+</sup> and PTEN<sup>-/-</sup> cells were incubated in the absence or presence of 200 nM MMC for 18 h, allowed to recover for 8 h, and FANCD2 (B) and FANCI (C) nuclear foci formation was analyzed by immunofluorescence microscopy (IF). Quantification of the percentage of PTEN<sup>+/+</sup> and PTEN<sup>-/-</sup> nuclei displaying greater than five discrete FANCD2 or FANCI nuclear foci reveals defective MMC-inducible FANCD2 and FANCI foci formation in PTEN<sup>-/-</sup> cells. \*\*\*,  $P < 0.001$ . (D) Immunoblotting for FANCD2, FANCI, and RAD51 reveals no appreciable differences in total cellular levels of MMC-inducible FANCD2 and FANCI monoubiquitination or RAD51 between MCF10A PTEN<sup>+/+</sup> and PTEN<sup>-/-</sup> cells. Cells were incubated in the absence or presence of 200 nM MMC for 24 h and allowed to recover for 8 h. (E) Chromatin fractionation analysis of lysates from MCF10A PTEN<sup>+/+</sup> and PTEN<sup>-/-</sup> cells reveals efficient localization of FANCD2, FANCI, and RAD51 to chromatin following MMC treatment. Cells were incubated in the absence (NT) or presence of 200 nM MMC for 24 h. W, unfractionated whole-cell lysate; S, soluble cytoplasmic and nuclear fraction; C, chromatin-enriched fraction. Immunoblotting experiments were performed multiple times with similar results. Protein band quantifications are from the immunoblots shown and are representative of results from several experiments.

**Figure S3. Increased FANCM instability and defective chromatin recruitment of the FA core complex in PTEN-deficient cells**

(A) Immunoblotting analyses of whole-cell lysates from HCT116 PTEN<sup>+/+</sup> and PTEN<sup>-/-</sup> cells reveal decreased levels of FANCM in PTEN<sup>-/-</sup> cells. Cells were incubated in the absence (NT) or presence of 40 nM mitomycin C (MMC) for 18 h and allowed to recover for up to 24 h. (B) Immunoblotting analyses of whole-cell lysates from MCF10A PTEN<sup>+/+</sup> and PTEN<sup>-/-</sup> cells reveal decreased levels of FANCM in PTEN<sup>-/-</sup> cells. Cells were treated as described for (A). RBI, Relative protein band intensity with respect to lane 1. (C) MCF10A PTEN<sup>+/+</sup> and PTEN<sup>-/-</sup> cells were incubated in the absence or presence of 40 µg/mL cycloheximide (CHX) alone or 40 µg/mL CHX and 4 µM MG132 (CHX + MG) for the indicated times. Whole-cell lysates were prepared and immunoblotted with anti-FANCM, anti-p53, anti-PTEN, and anti-α-tubulin antibodies. RBI, Relative protein band intensity with respect to the untreated sample lane. (D) Quantification of FANCM nuclear foci formation in HCT116 PTEN<sup>+/+</sup> and PTEN<sup>-/-</sup> cells reveals a defect in MMC-inducible FANCM nuclear foci formation in PTEN<sup>-/-</sup> cells. Cells were incubated in the absence (NT) or presence of 40 nM MMC for 18 h. \*\*\*,  $P < 0.001$ . (E) Quantification of FANCA nuclear foci formation in HCT116 PTEN<sup>+/+</sup> and PTEN<sup>-/-</sup> cells reveals reduced MMC-inducible FANCA nuclear foci formation in PTEN<sup>-/-</sup> cells. Cells were treated as described for (D). \*\*\*,  $P < 0.001$ . (F) Chromatin fractionation analysis of HCT116 PTEN<sup>+/+</sup> and PTEN<sup>-/-</sup> cells reveals a defect in the localization of FANCA to chromatin following MMC treatment. Cells were incubated in the absence (NT) or presence of 200 nM MMC for 24 h. W, unfractionated whole-cell lysate; S, soluble cytoplasmic and nuclear fraction; C, chromatin fraction. C:W, Ratio of protein in the chromatin fraction versus the whole-cell lysate. For (A-C and F), to improve clarity and conciseness, the presented blots have been cropped. (G) Defective

MMC-inducible FANCM nuclear foci formation in HCT116 PTEN<sup>-/-</sup> cells. Cells were treated as described for (D). (H) Defective MMC-inducible FANCA nuclear foci formation in HCT116 PTEN<sup>-/-</sup> cells. Cells were treated as described for (D). Immunoblotting experiments were performed multiple times with similar results. Protein band quantifications are from the immunoblots shown and are representative of results from several experiments.

**Figure S4. PTEN does not dephosphorylate PLK1-phosphorylated FANCM *in vitro***

FANCM was incubated in the presence of PLK1, <sup>32</sup>P-ATP and increasing concentrations of PTEN or PTEN-C124S (lipid and protein phosphatase defective). SDS-PAGE was used to separate the proteins and phosphorylation levels were detected by exposing the dried gel to radiographic film. Lanes 5-7 show the input proteins in isolation. \*, Indicates some minor contaminants within protein preparations, in particular a minor band in PLK1 preparations runs at the same size as PTEN and is phosphorylated by PLK1 even in the absence of PTEN addition. Some PLK1 autophosphorylation also occurs.

**Figure S5. Increased  $\gamma$ H2AX and 53BP1 nuclear foci formation in PTEN-deficient cells**

(A) Quantification of  $\gamma$ H2AX nuclear foci formation in MCF10A PTEN<sup>+/+</sup> and PTEN<sup>-/-</sup> cells reveals constitutively elevated and persistent  $\gamma$ H2AX nuclear foci in PTEN<sup>-/-</sup> cells. Cells were incubated in the absence (NT) or presence of 200 nM MMC for 18 h and allowed to recover for up to 24 h. \*\*\*,  $P < 0.001$ . (B) Quantification of 53BP1 nuclear foci formation in PTEN<sup>+/+</sup> and PTEN<sup>-/-</sup> cells reveals elevated levels of 53BP1 nuclear foci in PTEN<sup>-/-</sup> cells with and without MMC treatment. Cells were treated as described for (A). \*,  $P < 0.05$ ; \*\*,  $P < 0.01$ ; \*\*\*,  $P < 0.001$ . (C) Chromatin fractionation analysis of HCT116 PTEN<sup>+/+</sup> and PTEN<sup>-/-</sup> cells reveals



increased 53BP1 chromatin localization in PTEN<sup>-/-</sup> cells with and without MMC treatment. Cells were incubated in the absence (NT) or presence of 40 nM MMC for 18 h. W, unfractionated whole-cell lysate; S, soluble cytoplasmic and nuclear fraction; C, chromatin fraction. (D and E) Quantification of RAD51 nuclear foci formation in HCT116 (D) and MCF10A (E) PTEN<sup>+/+</sup> and PTEN<sup>-/-</sup> cells reveals no appreciable differences in the levels of RAD51 nuclear foci formation between PTEN<sup>+/+</sup> and PTEN<sup>-/-</sup> cells. Cells were incubated in the absence (NT) or presence of 40 nM (HCT116) or 200 nM (MCF10A) MMC for 18 h and allowed to recover for up to 24 h (E).

**Figure S6. PTEN function in ICL repair is protein phosphatase and SUMOylation-dependent**

(A) HCT116 PTEN<sup>-/-</sup> cells were stably transduced with pLenti6.2-LacZ, -PTEN-WT, -PTEN-C124S, -PTEN-G129E, -PTEN-K254R, and -PTEN-Y138L. Whole-cell lysates were prepared and immunoblotted for PTEN, AKT, AKT pS473, RAD51, and  $\alpha$ -tubulin. (B) PTEN-Y138L fails to rescue the sensitivity of PTEN<sup>-/-</sup> cells to the clastogenic effects of mitomycin C (MMC), in contrast to PTEN-WT. Cells were incubated in the absence (NT) or presence of 20 nM MMC for 24 h and metaphase spreads were analyzed for structural chromosome aberrations. \*\*\*,  $P < 0.001$ . (C and D) Defective FANCD2 (C) and FANCI (D) nuclear foci formation in PTEN<sup>-/-</sup> cells expressing PTEN-Y138L. Cells were incubated in the absence (NT) or presence of 200 nM MMC for 18 h. \*\*\*,  $P < 0.001$ . (E and F) Defective FANCA (E) and FANCM (F) nuclear foci formation in PTEN<sup>-/-</sup> cells expressing LacZ, PTEN-C124S, PTEN-K254R, and PTEN-Y138L. Cells were incubated in the absence (NT) or presence of 200 nM MMC for 18 h. \*\*\*,  $P < 0.001$ .

### **Figure S7. PTEN SUMOylation promotes its efficient chromatin removal**

(A) HCT116 PTEN<sup>-/-</sup> cells stably transduced with pLenti6.2-PTEN-WT and -PTEN-K254R were incubated in the absence (NT) or presence of 200 nM MMC for 24 h. W, unfractionated whole-cell lysate; S, soluble cytoplasmic and nuclear fraction; C, chromatin fraction. Fractions were immunoblotted for PTEN, H2A, and  $\alpha$ -tubulin. C:W, ratio of chromatin-bound protein to total cellular protein. (B) MCF10A PTEN<sup>-/-</sup> cells stably transduced with pLenti6.2-PTEN-WT and -PTEN-K254R were incubated in the absence (NT) or presence of 200 nM MMC for 24 h, and a cellular fractionation protocol was performed as described in (A). Immunoblotting experiments were performed multiple times with similar results. Protein band quantifications are from the immunoblots shown and are representative of results from several experiments.

### **Figure S8. FANCD2 and PTEN epistasis analysis**

(A) Metaphase chromosome analysis of FA-D2 (*FANCD2*<sup>-/-</sup>) cells reveals that knockdown of PTEN (siPTEN) does not lead to a further increase in the levels of complex chromosome aberrations. siCtrl, control, non-targeting siRNA. (B) siRNA-mediated knockdown of FANCD2 in the PTEN-deficient prostate adenocarcinoma cell line PC-3. (C) Knockdown of FANCD2 (siFANCD2) in PC-3 cells does not lead to a further increase in sensitivity to MMC cytotoxicity. siCtrl, control, non-targeting siRNA. (D-F) Metaphase chromosome analysis of PC-3 cells reveals that knockdown of FANCD2 does not lead to a further increase in the levels of chromosome gaps and breaks (D), complex chromosome aberrations (E), or total chromosome aberrations (F).

### **Figure S9. Proposed model of the role of PTEN in ICL repair**

PTEN has previously been shown to be required for the assembly of APC/C-CDH1 and the degradation of PLK1<sup>3</sup>. PLK1 directly phosphorylates PTEN, promoting its accumulation in chromatin<sup>4</sup>. In turn, PTEN dephosphorylates PLK1, leading to its inactivation and destabilization<sup>5</sup>. When PTEN is present, upon DNA damage, it dephosphorylates PLK1, which allows FANCM to promote the chromatin recruitment of FANCA and the FA core complex, resulting in efficient FANCD2 and FANCI nuclear foci formation and error-free ICL repair. In the absence of PTEN, PLK1 fails to be dephosphorylated, remains constitutively active and phosphorylates FANCM. FANCM phosphorylation leads to its ubiquitination and subsequent degradation by the proteasome. The FANCM phosphatase remains to be identified. When FANCM levels are low, the chromatin recruitment of FANCA and the FA core complex is attenuated, leading to inefficient FANCD2 and FANCI nuclear foci formation and error-prone ICL repair. A, FANCA; D2, FANCD2; I, FANCI; M, FANCM; P, phosphorylation; Ub, ubiquitination. Black- and grey-filled arrows indicate functional and non-functional steps, respectively.

### **Figure S10. Validation of the FANCM mouse monoclonal antibodies used in these studies**

293 cells were transfected with control non-targeting siRNA (lane 1) or siRNA targeting FANCM (lane 2). Whole-cell extracts were prepared in 10 mM Tris, 150 mM NaCl, 10%v/v glycerol, 0.1%w/v Triton X-100, 2 U/mL benzonase. Proteins were resolved on NuPAGE 3-8% w/v Tris-Acetate gels (Invitrogen), transferred to polyvinylidene difluoride (PVDF) membranes, and immunoblotted with the indicated anti-FANCM mouse monoclonal antibodies.

## References

- 1 Chia, Y. C. *et al.* The C-terminal tail inhibitory phosphorylation sites of PTEN regulate its intrinsic catalytic activity and the kinetics of its binding to phosphatidylinositol-4,5-bisphosphate. *Arch Biochem Biophys* **587**, 48-60 (2015).
- 2 Coulthard, R. *et al.* Architecture and DNA recognition elements of the Fanconi anemia FANCM-FAAP24 complex. *Structure* **21**, 1648-1658 (2013).
- 3 Song, M. S. *et al.* Nuclear PTEN regulates the APC-CDH1 tumor-suppressive complex in a phosphatase-independent manner. *Cell* **144**, 187-199 (2011).
- 4 Choi, B. H., Pagano, M. & Dai, W. Plk1 protein phosphorylates phosphatase and tensin homolog (PTEN) and regulates its mitotic activity during the cell cycle. *J Biol Chem* **289**, 14066-14074 (2014).
- 5 Zhang, Z. *et al.* PTEN regulates PLK1 and controls chromosomal stability during cell division. *Cell Cycle*, 1-10 (2016).

Figure S1

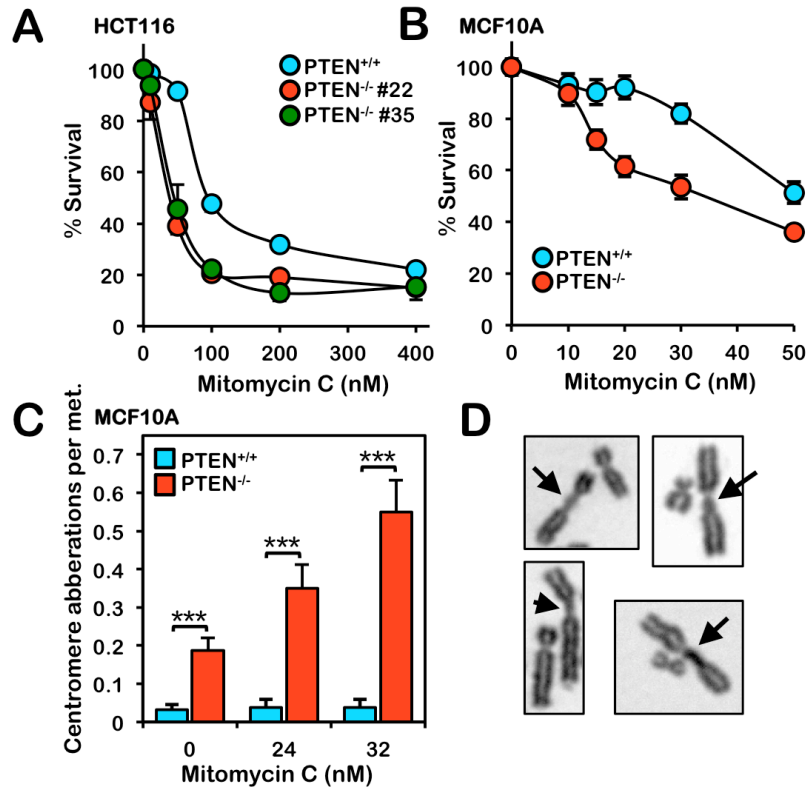

**Figure S2A-C**

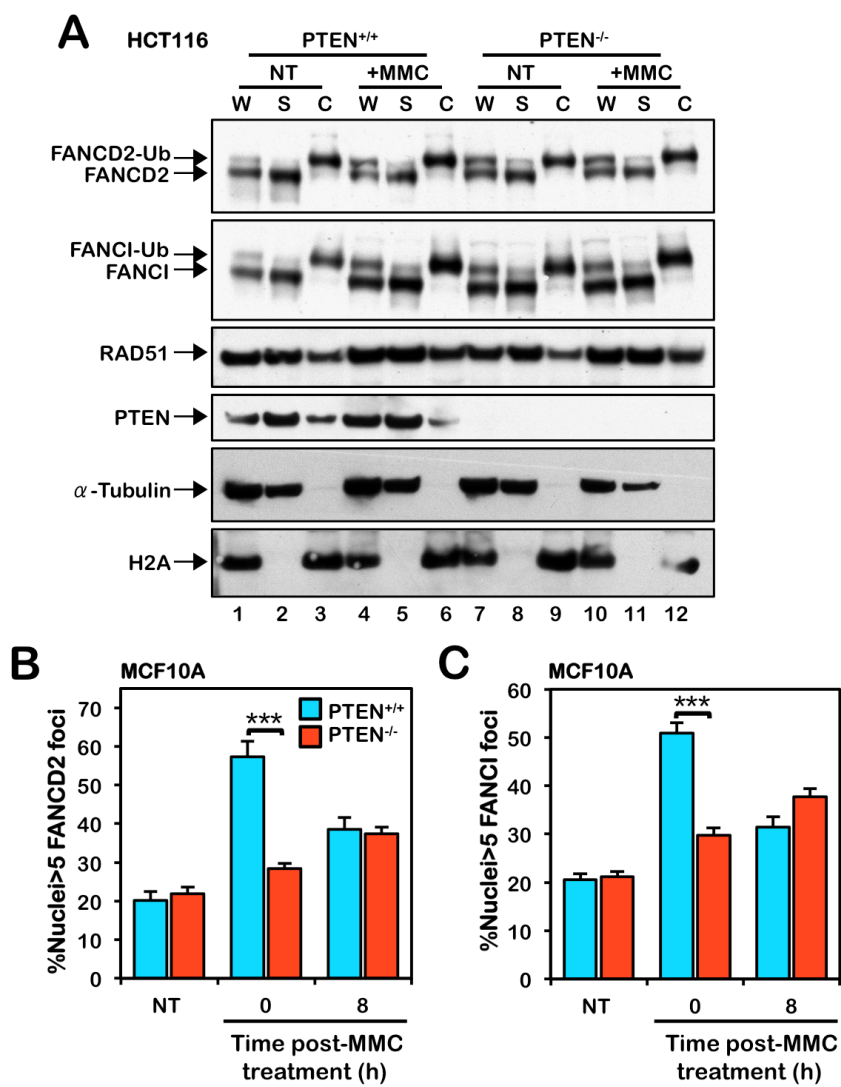

# Figure S2D-E

**D**

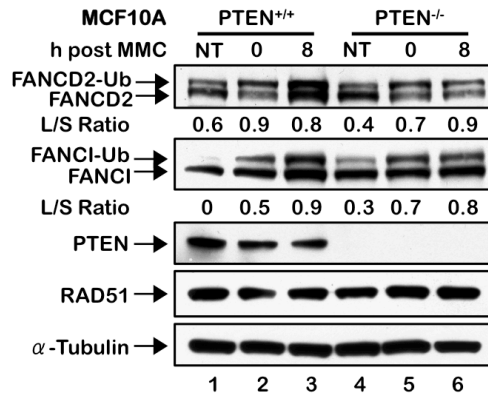

**E**

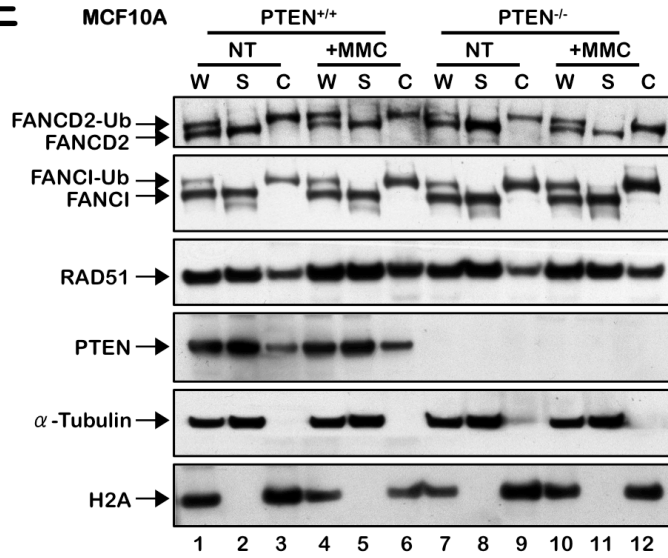

**Figure S3A-C**

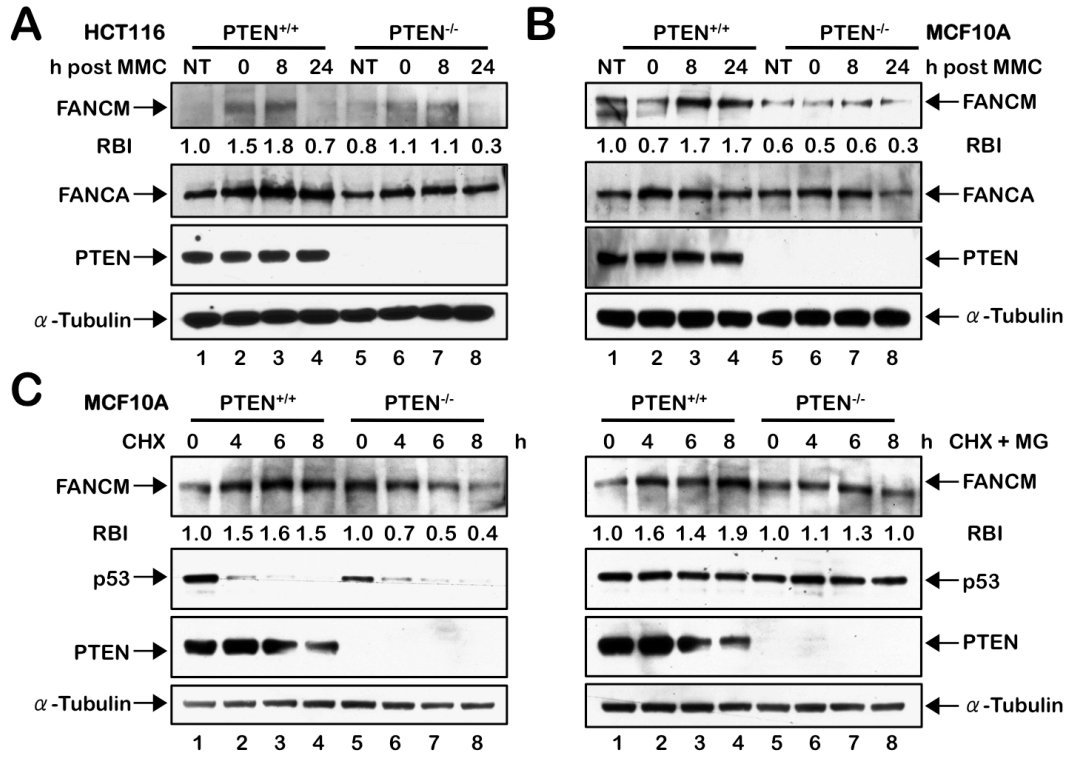



**Figure S3D-F**

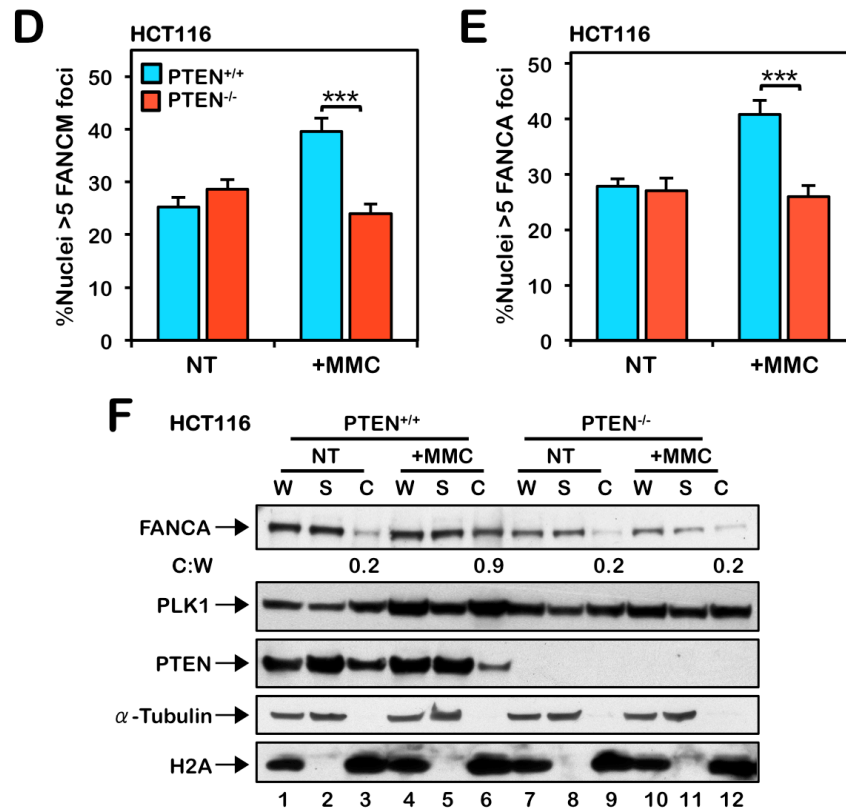

**Figure S3G**

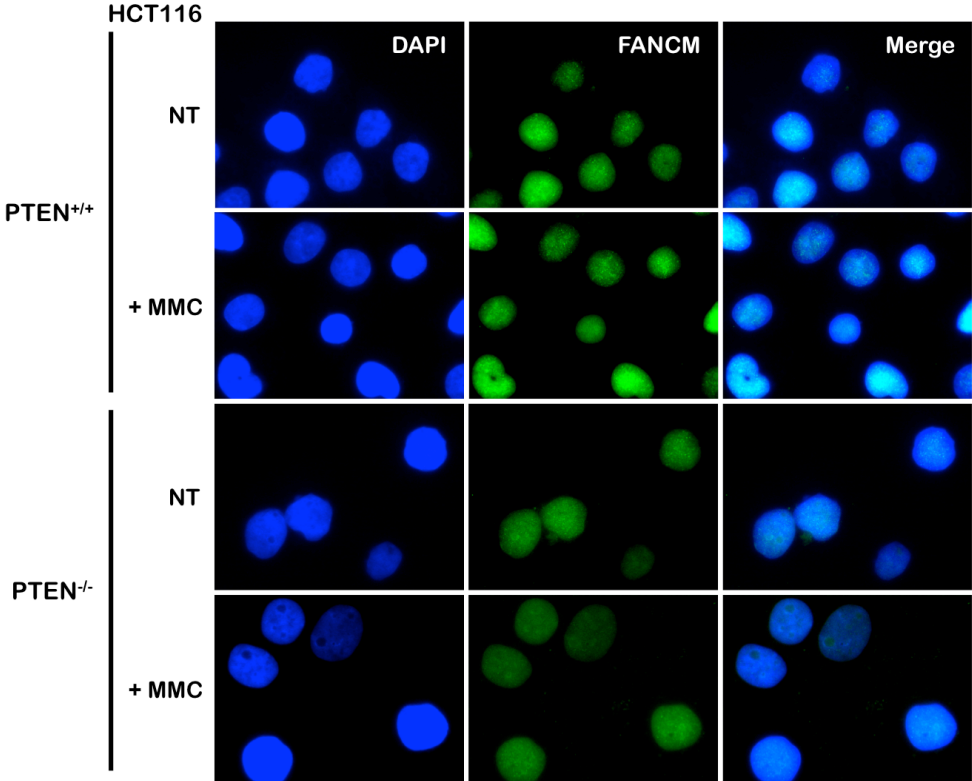

**Figure S3H**

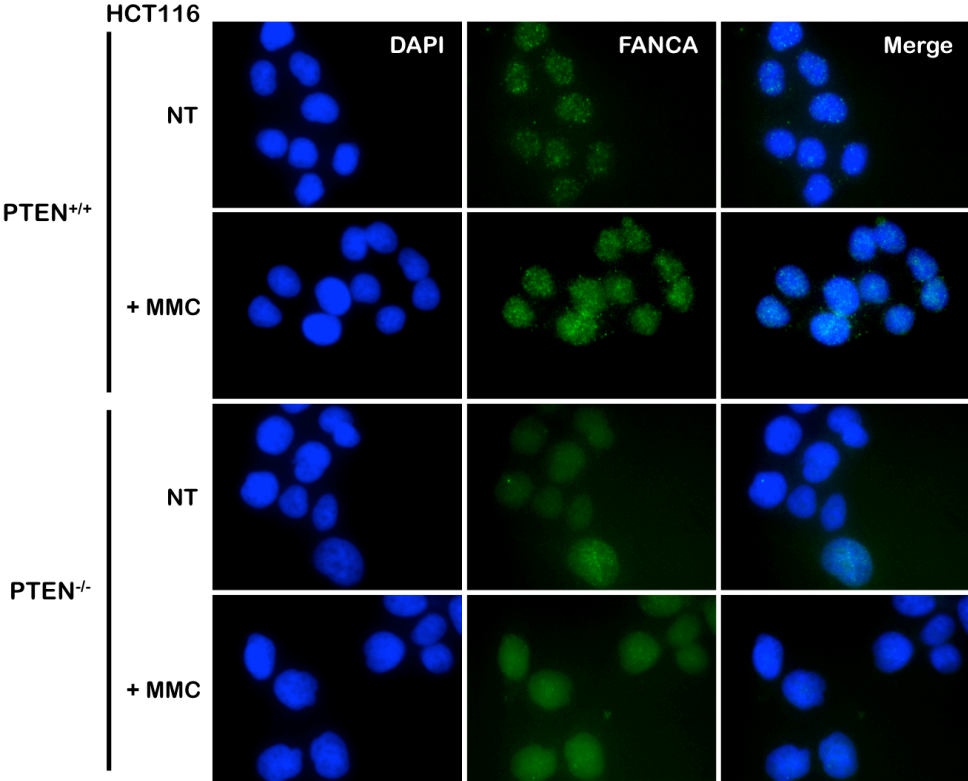

**Figure S4**

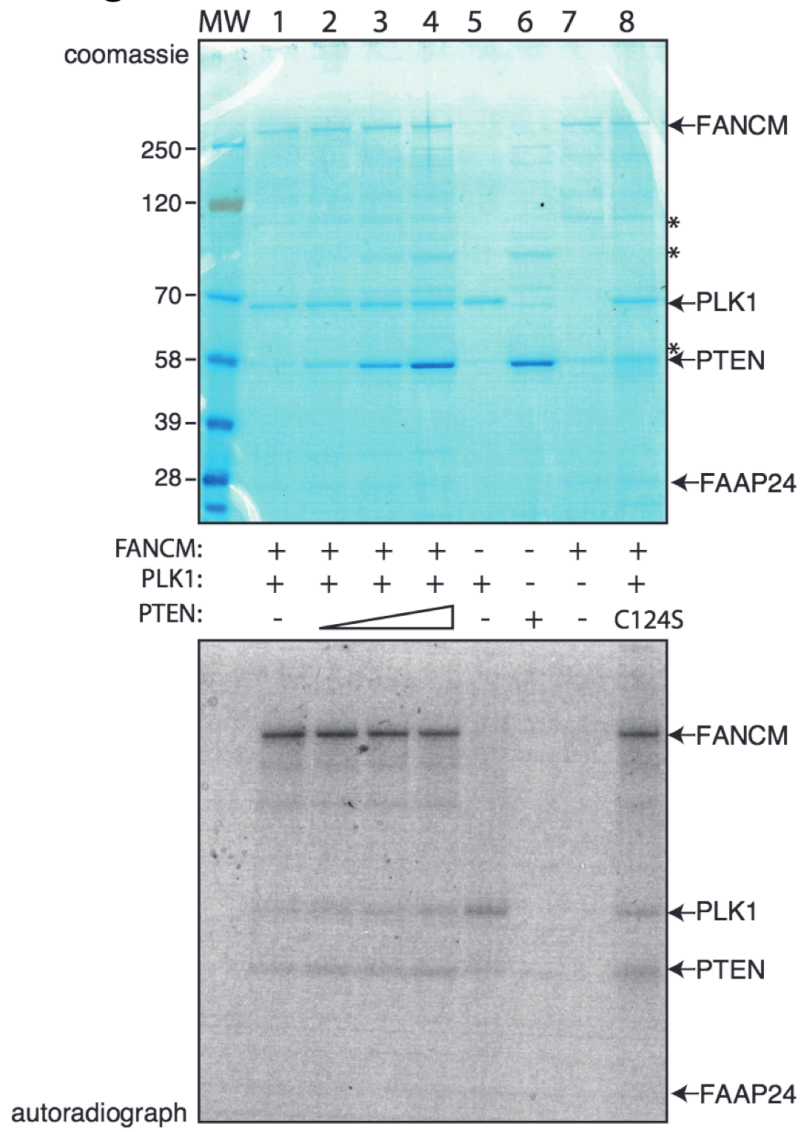

**Figure S5**

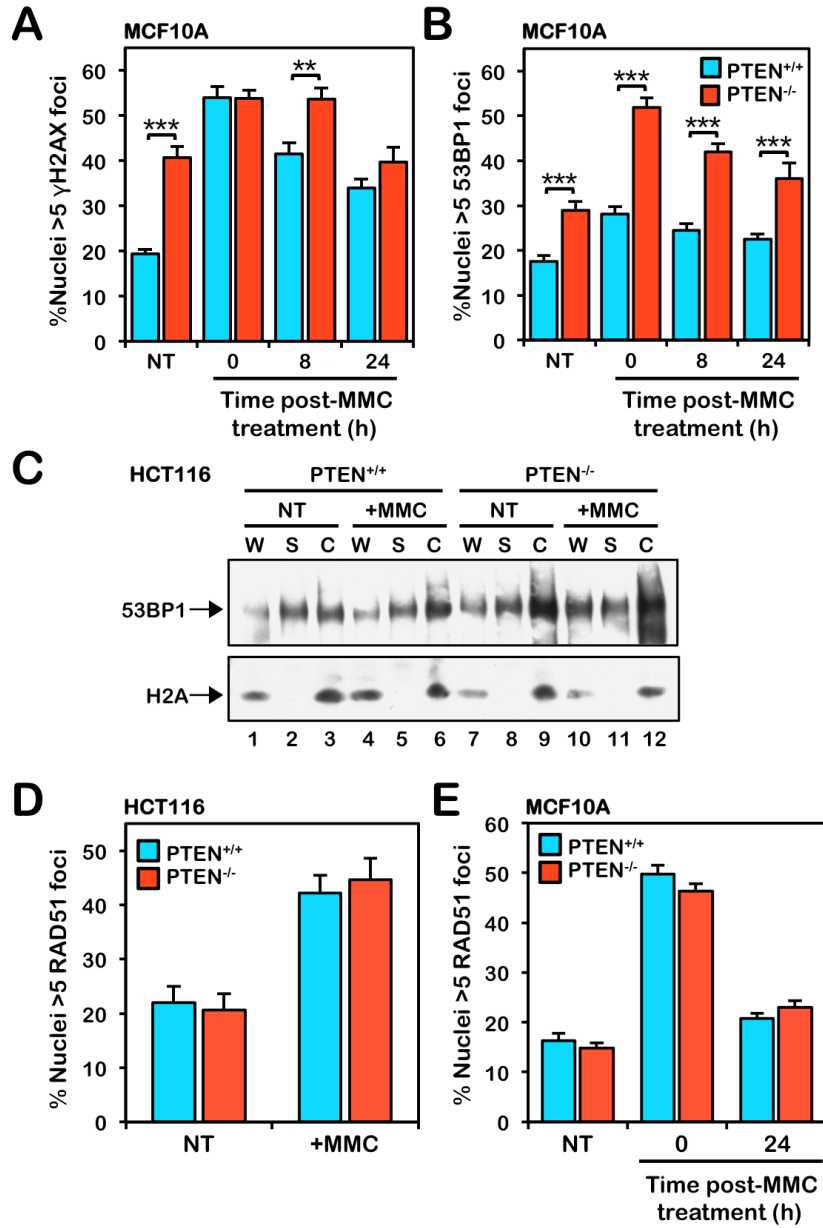

Figure S6A-D

**A**

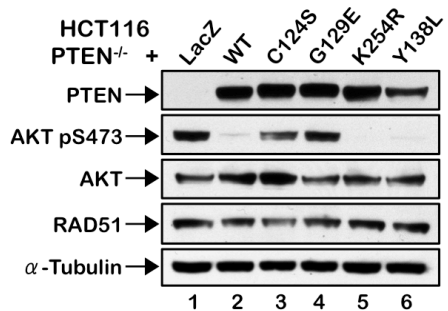

**B**

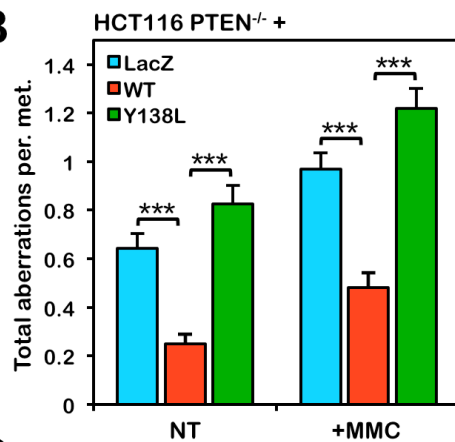

**C**

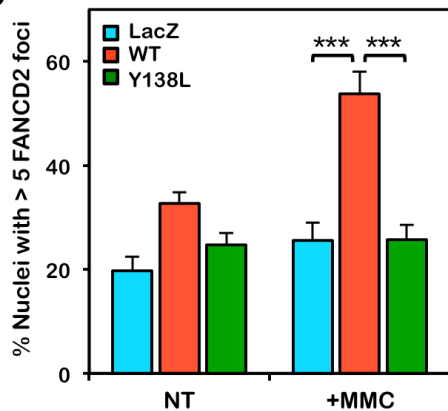

**D**

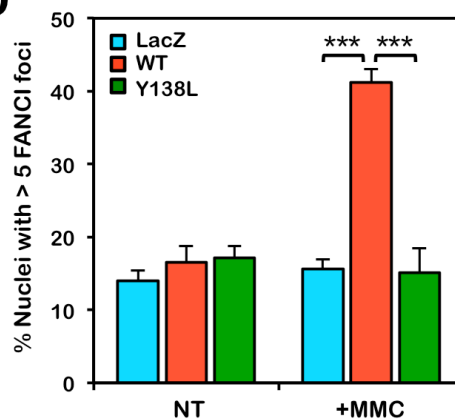

Figure S6E-F

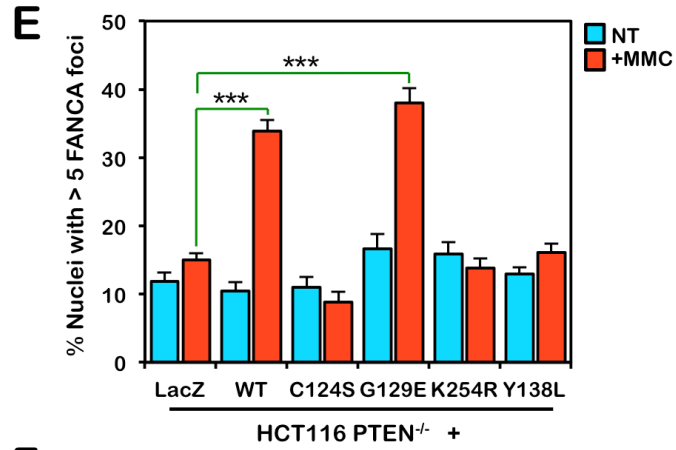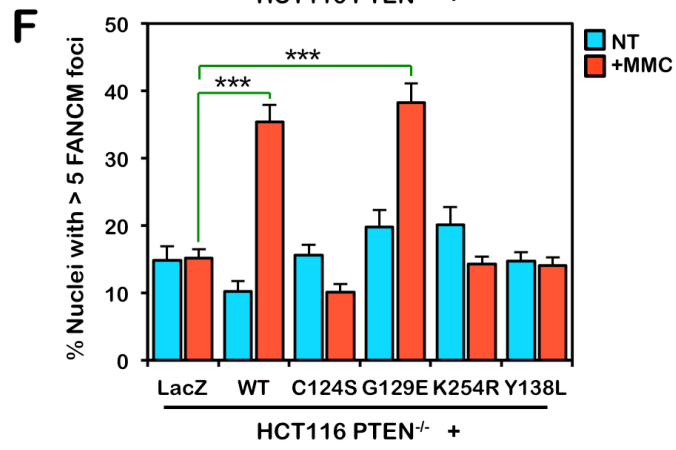

**Figure S7**

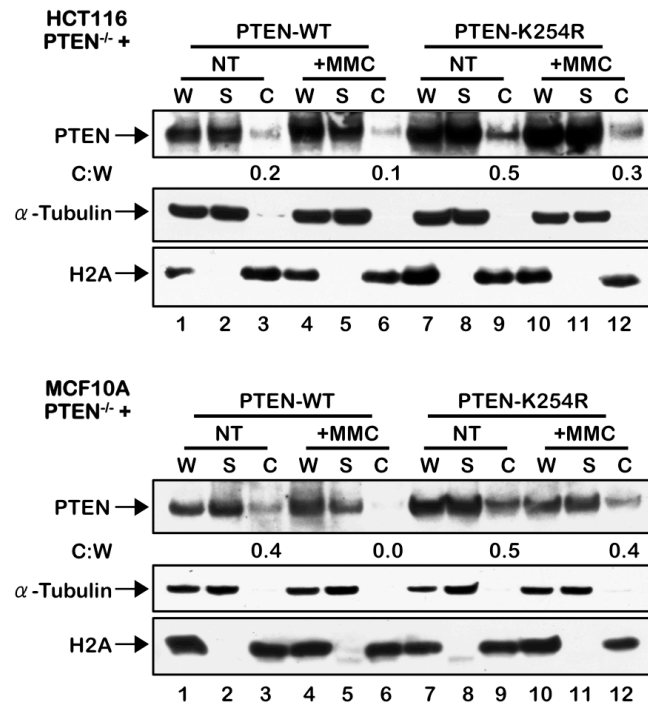



**Figure S8**

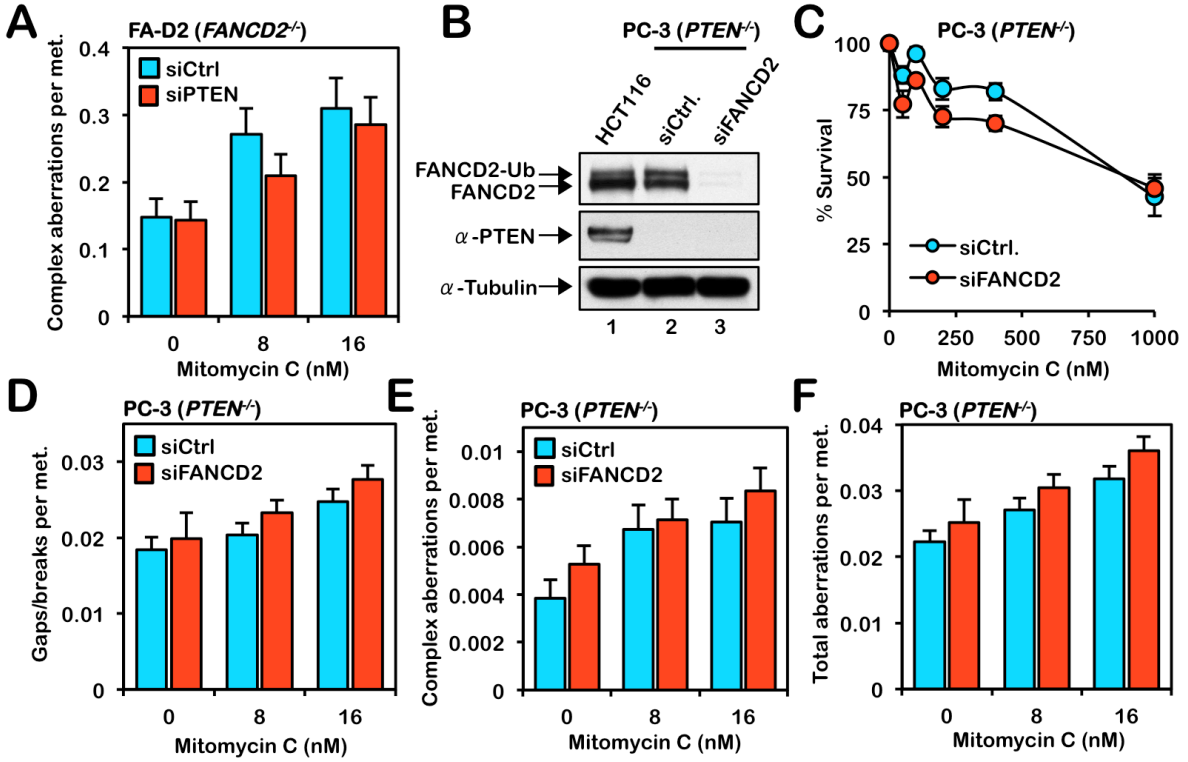

Figure S9

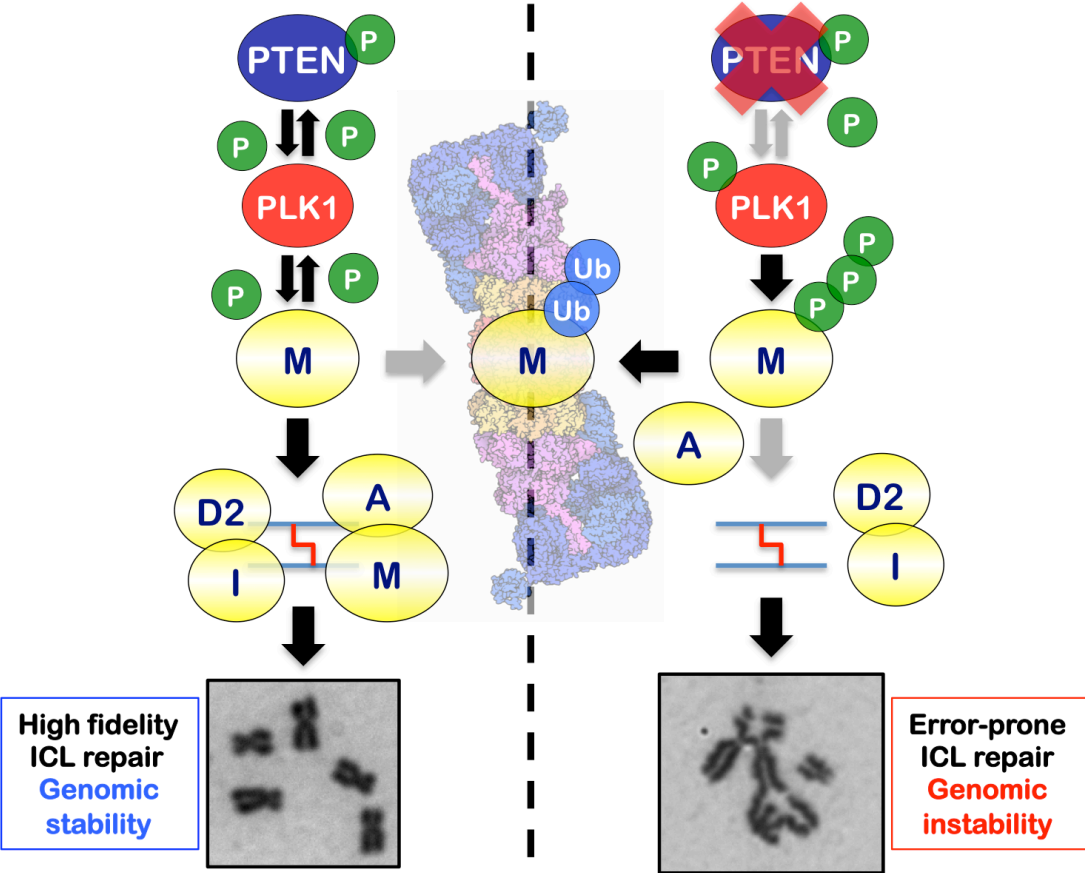

**Figure S10**

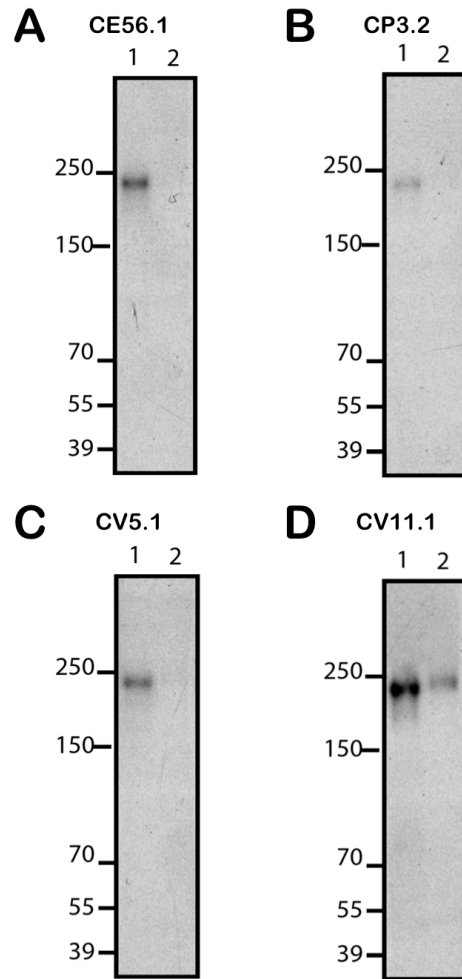

Supplement: srep36439-s1.pdf [file srep36439-s1.pdf]
